# Supplementary material for: Selective hydrogenation of CO2 to methanol catalyzed by Cu supported on rod-like La2O2CO3
Source: Royal Society of Chemistry journal article supplement (doi:10.1039/c7cy01998j), 2018-01-01
Supplement: c7cy01998j1.pdf [file c7cy01998j1.pdf]

## Supporting Information

### **Selective hydrogenation of CO<sub>2</sub> to methanol catalyzed by Cu supported on rod-like La<sub>2</sub>O<sub>2</sub>CO<sub>3</sub>**

Kun Chen, Xinping Duan, Huihuang Fang, Xuelian Liang, Youzhu Yuan\*

State Key Laboratory of Physical Chemistry of Solid Surfaces, National Engineering

Laboratory for Green Chemical Productions of Alcohols-Ethers-Esters, iChEM, College of

Chemistry and Chemical Engineering, Xiamen University, Xiamen 361005, China. Email:

zyyuan@xmu.edu.cn

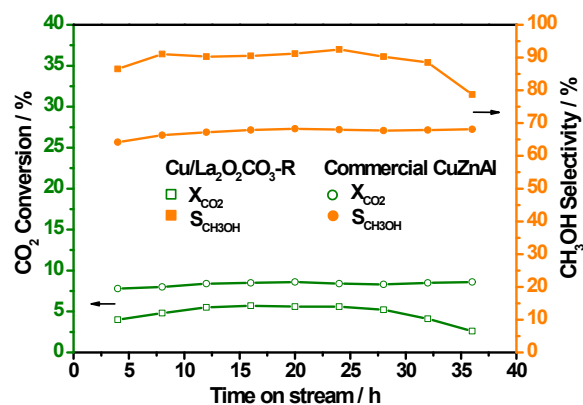

Fig. S1 Stability of Cu/La<sub>2</sub>O<sub>3</sub>CO<sub>3</sub>-R and commercial CuZnAl catalysts. Reaction conditions: 3.0 MPa, 240 °C, GHSV = 12000 mL (STP) g-cat<sup>-1</sup> h<sup>-1</sup>.

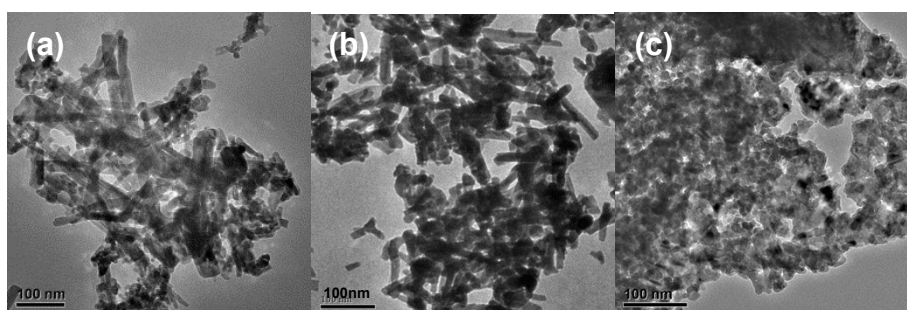

Fig. S2 TEM images of (a) Cu/La<sub>2</sub>O<sub>3</sub>CO<sub>3</sub>-R after 24 h reaction and (b) Cu/La<sub>2</sub>O<sub>3</sub>CO<sub>3</sub>-R after 36 h reaction. (c) Cu/La<sub>2</sub>O<sub>3</sub>CO<sub>3</sub>-A after reduction.

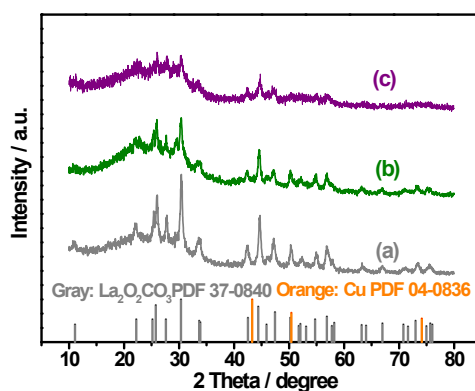

Fig. S3 XRD patterns of (a) Cu/La<sub>2</sub>O<sub>3</sub>CO<sub>3</sub>-R before reaction, (b) Cu/La<sub>2</sub>O<sub>3</sub>CO<sub>3</sub>-R after 24 h reaction, and (c) Cu/La<sub>2</sub>O<sub>3</sub>CO<sub>3</sub>-R after 36 h reaction.
